# Supplementary material for: Advances in Egyptian Mediterranean Coast Climate Change Monitoring
Source: MDPI journal article supplement (doi:10.3390/w13131870), 2021-07-05
Supplement: s1 [file s1]

Archive with 4 entries (4 files):
- Suppl. Fig A1a.pdf
- Suppl. Fig A1b.pdf
- Suppl. Fig A1c.pdf
- water-1234516 supplementary.pdf
