# Supplementary material for: Advances in Egyptian Mediterranean Coast Climate Change Monitoring
Source: MDPI journal article supplement (doi:10.3390/w13131870), 2021-07-05
Supplement: s1 [file s1 › Suppl. Fig A1a.pdf]

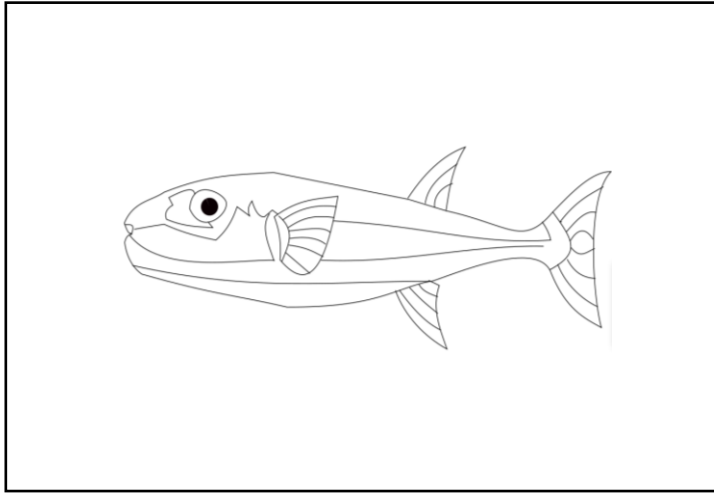

**Figure A1a.** Toxic harmful species, *Lagocephalus scelleratus*  
Schematic image created by co-author Sara Inglese.
