# Supplementary material for: Advances in Egyptian Mediterranean Coast Climate Change Monitoring
Source: MDPI journal article supplement (doi:10.3390/w13131870), 2021-07-05
Supplement: s1 [file s1 › Suppl. Fig A1b.pdf]

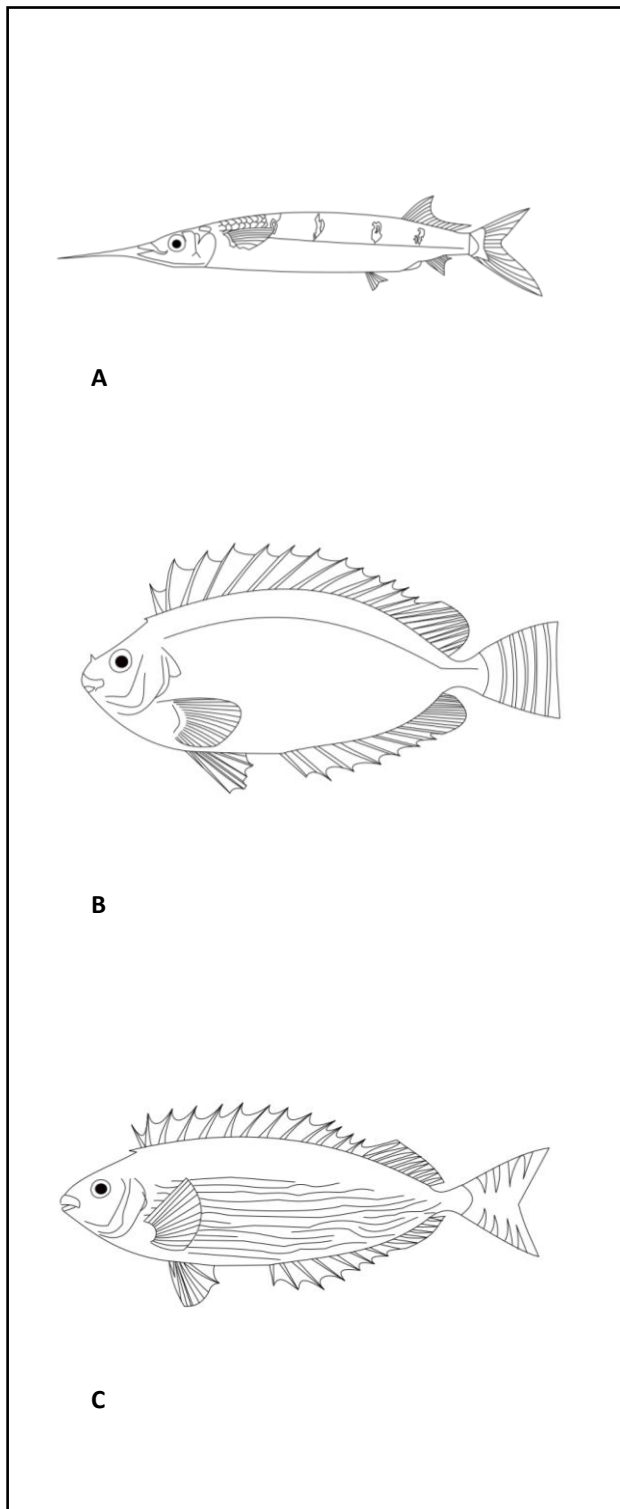

**Figure A1b.** Herbivores harmful species found in all the ports examined **A.** *Hemiramphus far* **B.** *Siganus luridus* **C.** *Siganus rivulatus*.  
Schematic images created by co-author Sara Inglese.
