# Supplementary material for: Advances in Egyptian Mediterranean Coast Climate Change Monitoring
Source: MDPI journal article supplement (doi:10.3390/w13131870), 2021-07-05
Supplement: s1 [file s1 › Suppl. Fig A1c.pdf]

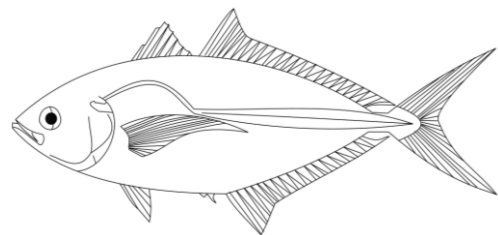

**A**

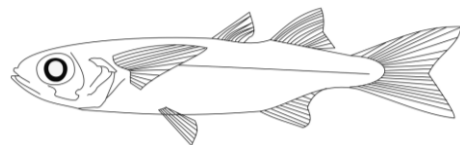

**B**

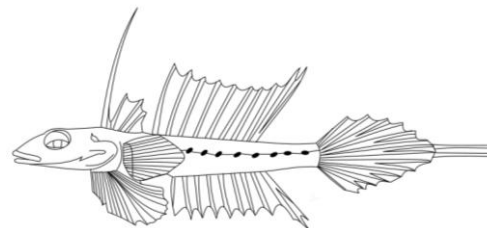

**C**

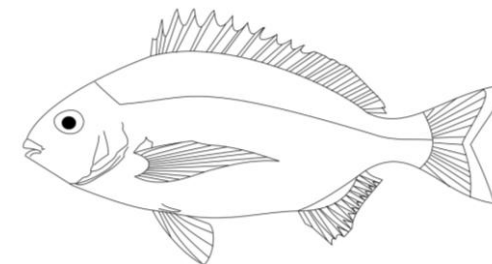

**D**

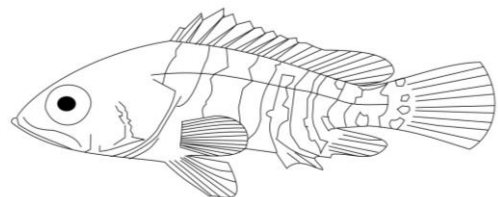

**E**

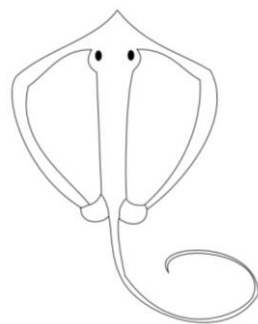

**F**

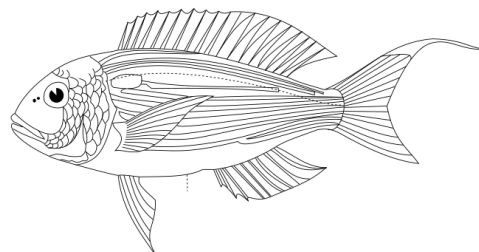

**G**

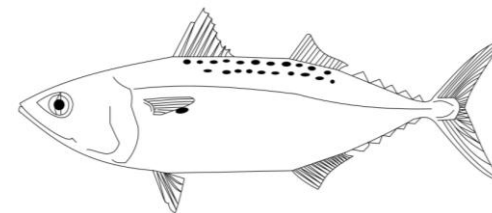

**H**

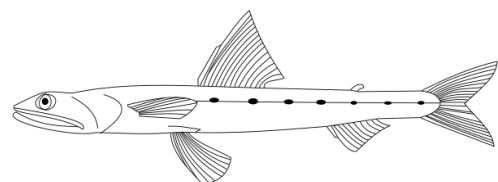

**I**

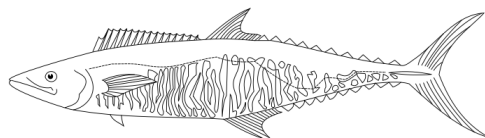

**J**

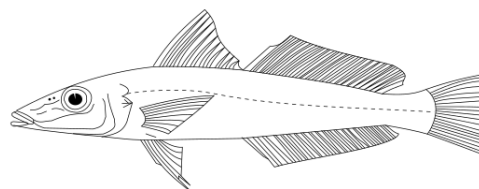

**K**

**Figure A1c.** Additional harmful species **A.** *Alepes djedaba* **B.** *Atherinomorus lacunosus* **C.** *Callionymus filamentosus* **D.** *Crenidens crenidens* **E.** *Epinephelus malabaricus* **F.** *Himantura uarnak* **G.** *Nemipterus japonicus* **H.** *Rastrelliger kanagurta* **I.** *Saurida undosquamis* **J.** *Scomberomorus commerson* **K.** *Sillago sihama*. Schematic images created by co-author Sara Inglese.
