# Supplementary material for: Advances in Egyptian Mediterranean Coast Climate Change Monitoring
Source: MDPI journal article supplement (doi:10.3390/w13131870), 2021-07-05
Supplement: s1 [file s1 › water-1234516 supplementary.pdf]

**Supplementary Table A1.** An inventory of non-indigenous fish species (NIS) sighted in Egyptian Mediterranean harbours from 1991-2021.

| NIS                                                      | References       | Egyptian Mediterranean Harbours                                             |
|----------------------------------------------------------|------------------|-----------------------------------------------------------------------------|
| <i>Alepes djedaba</i> (Forsskål, 1775)                   | [51,53,56]       | From El-Arish to El-Sallum; Alexandria                                      |
| <i>Anthias anthias</i> (Linnaeus, 1758)                  | [54]             | Damiette                                                                    |
| <i>Apogonichthyoides pharaonis</i> (Bellotti, 1874)      | [51,53,58]       | From El-Arish to El-Sallum; Alexandria                                      |
| <i>Atherinomorus lacunosus</i> (Forster, 1801)           | [51,53]          | From El-Arish to El-Sallum                                                  |
| <i>Aulopareia unicolor</i> (Valenciennes, 1837)          | [53,58]          | From El-Arish to El-Sallum; Alexandria                                      |
| <i>Auxis rochei</i> (Risso, 1810)                        | [59]             | Alexandria                                                                  |
| <i>Callionymus filamentosus</i> (Valenciennes, 1837)     | [51,53,56,58]    | From El-Arish to El-Sallum; Alexandria                                      |
| <i>Coryogalops ochetica</i> (Norman, 1927)               | [51,53]          | From El-Arish to El-Sallum                                                  |
| <i>Crenidens crenidens</i> (Forsskål, 1775)              | [51,53]          | From El-Arish to El-Sallum; Alexandria                                      |
| <i>Cynoglossus sinusarabici</i> (Chabanaud, 1931)        | [51,53]          | From El-Arish to El-Sallum                                                  |
| <i>Dentex macrophthalmus</i> (Bloch, 1791)               | [59]             | Alexandria                                                                  |
| <i>Dussumieria elopoides</i> (Bleeker, 1849)             | [51,53,58]       | From El-Arish to El-Sallum; Alexandria                                      |
| <i>Enchelycore anatina</i> (Lowe, 1838)                  | [59]             | Alexandria                                                                  |
| <i>Epinephelus malabaricus</i> (Bloch & Schneider, 1804) | [51,53]          | From El-Arish to El-Sallum                                                  |
| <i>Equulites klunzingeri</i> (Steindachner, 1898)        | [51,53,58]       | From El-Arish to El-Sallum; Alexandria                                      |
| <i>Etrumeus teres</i> (DeKay, 1842)                      | [51,52,55]       | From El-Arish to El-Sallum; El-Hamam                                        |
| <i>Fistularia commersonii</i> (Rüppell, 1838)            | [51,52,58,42]    | From El-Arish to El-Sallum; Alexandria                                      |
| <i>Gobius cobitis</i> (Pallas, 1814)                     | [59]             | Alexandria                                                                  |
| <i>Hemiramphus far</i> (Forsskål, 1775)                  | [51,53]          | From El-Arish to El-Sallum                                                  |
| <i>Herklotsichthys punctatus</i> (Rüppell, 1837)         | [51,53,56,60]    | From El-Arish to El-Sallum; Alexandria; El-Alamain                          |
| <i>Himantura uarnak</i> (Gmelin, 1789)                   | [51,53]          | From El-Arish to El-Sallum                                                  |
| <i>Jaydia smithi</i> (Kotthaus, 1970)                    | [53,58]          | From El-Arish to El-Sallum; Alexandria                                      |
| <i>Lagocephalus scleratus</i> (Gmelin, 1789)             | [51 – 53,56]     | From El-Arish to El-Sallum; Alexandria                                      |
| <i>Lagocephalus spadiceus</i> (Richardson, 1845)         | [53,58]          | From El-Arish to El-Sallum; Alexandria                                      |
| <i>Lagocephalus suezensis</i> (Clark & Gohar, 1953)      | [51,52,58]       | From El-Arish to El-Sallum; Alexandria                                      |
| <i>Liza carinata</i> (Valenciennes, 1836)                | [51,53,56]       | From El-Arish to El-Sallum; Alexandria                                      |
| <i>Nemipterus japonicus</i> (Bloch, 1791)                | [51,53,58]       | From El-Arish to El-Sallum; Alexandria                                      |
| <i>Nemipterus randalli</i> (B. C. Russell, 1986)         | [51,53,58,39]    | From El-Arish to El-Sallum; Alexandria; Mersa Matruh                        |
| <i>Oxyurichtys petersi</i> (Klunzinger, 1871)            | [51,53]          | From El-Arish to El-Sallum                                                  |
| <i>Parexocoetus mento</i> (Valenciennes, 1847)           | [51,53]          | From El-Arish to El-Sallum                                                  |
| <i>Parupeneus forsskali</i> (Fourmanoir & Guézé, 1976)   | [60]             | Alexandria                                                                  |
| <i>Pelates quadrilineatus</i> (Bloch, 1790)              | [51,53]          | From El-Arish to El-Sallum                                                  |
| <i>Pempheris vanicolensis</i> (Kossmann & Räuber, 1877)  | [51]             | From El-Arish to El-Sallum; Alexandria                                      |
| <i>Pempheris rhomboidea</i> (Cuvier, 1829)               | [60]             | Alexandria                                                                  |
| <i>Pteragogus pelycus</i> (Randall, 1981)                | [51,60]          | From El-Arish to El-Sallum; El-Alamain                                      |
| <i>Pterois miles</i> (Bennett, 1828)                     | [61]             | Mersa Matruh                                                                |
| <i>Rastrelliger kanagurta</i> (Cuvier, 1817)             | [51,53]          | From El-Arish to El-Sallum                                                  |
| <i>Sargocentron rubrum</i> (Forsskål, 1775)              | [51,53,58,60,39] | From El-Arish to El-Sallum; Alexandria; El-Alamain; Mersa Matruh            |
| <i>Scaurus ghobban</i> (Forsskål, 1775)                  | [61]             | Mersa Matruh                                                                |
| <i>Scomberomorus commerson</i> (Lacépède, 1800)          | [51]             | From El-Arish to El-Sallum                                                  |
| <i>Sebastapistes nuchalis</i> (Günther, 1874)            | [51]             | From El-Arish to El-Sallum                                                  |
| <i>Siganus luridus</i> (Rüppell, 1828)                   | [51,58,60]       | From El-Arish to El-Sallum; Alexandria; El-Alamain                          |
| <i>Siganus rivulatus</i> (Forsskål & Niebuhr, 1775)      | [53,56,60,39]    | From El-Arish to El-Sallum; Port Said; Alexandria; El-Alamain; Mersa Matruh |

|                                                      |               |                                                      |
|------------------------------------------------------|---------------|------------------------------------------------------|
| <i>Sillago sihama</i> (Forsskål, 1775)               | [51]          | From El-Arish to El-Sallum                           |
| <i>Sphyraena flavicauda</i> (Rüppell, 1838)          | [51,53]       | From El-Arish to El-Sallum                           |
| <i>Sphyraena chrysotaenia</i> (Klunzinger, 1884)     | [51,53,58]    | From El-Arish to El-Sallum; Alexandria               |
| <i>Stephanolepis diaspros</i> (Fraser-Brunner, 1940) | [51,53,58]    | From El-Arish to El-Sallum; Alexandria               |
| <i>Terapon puta</i> (Cuvier, 1829)                   | [53,56]       | From El-Arish to El-Sallum; Alexandria               |
| <i>Tylosurus choram</i> (Ben-Tuvia & Golani, 1989)   | [51,53]       | From El-Arish to El-Sallum                           |
| <i>Upeneus moluccensis</i> (Bleeker, 1855)           | [51,53,58,60] | From El-Arish to El-Sallum; Alexandria               |
| <i>Upeneus pori</i> (Ben-Tuvia & Golani, 1989)       | [51,53,58]    | From El-Arish to El-Sallum; Alexandria; Mersa Matruh |
